# Supplementary material
Source: PubMed Central journal article supplement (PMC2951467)
Supplement: supp_123_20_3457__1.pdf [file supp_123_20_3457__1.pdf]

**Table S1. List of genes tested and dsRNAs used for screening for endocytic regulators of JAK–STAT signalling**

| <i>Drosophila</i> genes |                             | CG Nr.  | Forward primer                                                               | Reverse primer                                                               | Molecular function                                                  | Human homologues                                                    | Evidence   |
|-------------------------|-----------------------------|---------|------------------------------------------------------------------------------|------------------------------------------------------------------------------|---------------------------------------------------------------------|---------------------------------------------------------------------|------------|
| rh5                     | Rh5                         | CG5279  | gaattaatacactactatagggTAA<br>TACGACTACTATAGGG<br>AGAAGGGCTTCC                | gaattaatacactactatagggTAA<br>TACGACTACTATAGGG<br>AGAGCTGACACT                |                                                                     | OPN5<br>opsin 5 isoform 1                                           | Best Blast |
| z                       | LacZ                        |         | gaattaatacactactatagggTAA<br>TACGACTACTATAGGG<br>AGACAGTGGCGTCTGGC<br>GGAAAA | gaattaatacactactatagggTAA<br>TACGACTACTATAGGG<br>AGATCCGAGCCAGTTTA<br>CCCCGT |                                                                     | -                                                                   | -          |
| stat                    | STAT92E                     | CG4257  | taatacactactatagggTAATA<br>CGACTACTATAGGGAG<br>AAGCTGCTTGCCCA                | taatacactactatagggTAATA<br>CGACTACTATAGGGAG<br>CAGCTGAGAACCGA                |                                                                     | STAT5B<br>signal transducer and activator of transcription 5B       | Homologue  |
| socs                    | SOCS36E                     | CG15154 | gaattaatacactactatagggTAA<br>TACGACTACTATAGGG<br>AGAAACGTGCC                 | gaattaatacactactatagggTAA<br>TACGACTACTATAGGG<br>AGACCCCATCCA                |                                                                     | SOCS5<br>suppressor of cytokine signaling 5                         | UCSC       |
| 1                       | Rab5                        | CG3664  | taatacactactatagggGCTCG<br>TTTCGTTTCGTTTCT                                   | taatacactactatagggCTATC<br>TTAGGCTTGCAGACC                                   | GTP binding.<br>GTPase activity                                     | RAB5A<br>RAB5A, member RAS oncogene family                          | Homologue  |
|                         | Rab5                        | CG3664  | taatacactactatagggGGCAA<br>CCACTCCACGCA                                      | taatacactactatagggTCCTG<br>GCCAGCCGTGT                                       |                                                                     |                                                                     |            |
|                         | Rab5                        | CG3664  | taatacactactatagggGCTCT<br>CCTGGTACTCGTGGGA                                  | taatacactactatagggCATCC<br>ACACTCAGCAGCAAT                                   |                                                                     |                                                                     |            |
| 2                       | TSG101                      | CG9712  | taatacactactatagggTCCCTA<br>TTTGTATTTGGTTGATGG<br>A                          | taatacactactatagggATATG<br>GGGCTGCGATTTGT                                    | protein binding,<br>small conjugating<br>protein ligase<br>activity | TSG101<br>tumor susceptibility gene 101                             | Homologue  |
|                         | TSG101                      | CG9712  | taatacactactatagggATCCC<br>TCAAATCCCAGTTCC                                   | taatacactactatagggAAAGT<br>GGCGCTGTGGTG                                      |                                                                     |                                                                     |            |
| 3                       | Rab11                       | CG5771  | taatacactactatagggGCAAA<br>ACAATTAAGCGCAA                                    | taatacactactatagggATGTT<br>CTGGAATGCCGTTTC                                   | GTP binding.<br>GTPase activity,                                    | RAB11A<br>RAB11A, member RAS oncogene family                        | Homologue  |
| 4                       | Rab7                        | CG5915  | taatacactactatagggGGACA<br>CTGCTGGTCAGGAAC                                   | taatacactactatagggACTTG<br>AAACGCCATCTCCAC                                   | GTP binding.<br>GTPase activity                                     | RAB7A<br>RAB7A, member RAS oncogene family                          | Homologue  |
| 5                       | Hrs                         | CG2903  | taatacactactatagggTCCCA<br>AGAATGCCTTTGC                                     | taatacactactatagggCTGGT<br>ACTTGTCCGAGGAGC                                   | protein binding,<br>zinc ion binding                                | HGS<br>hepatocyte growth factor-regulated tyrosine kinase substrate | Homologue  |
|                         | Hrs                         | CG2903  | taatacactactatagggCAGCA<br>GATCATGCCCTG                                      | taatacactactatagggGGCGC<br>AGCTGCATCTC                                       |                                                                     |                                                                     |            |
| 6                       | Chc                         | CG9012  | taatacactactatagggTTGCC<br>ACCAAGTATCACGAA                                   | taatacactactatagggCCAGT<br>TCGTGCGTTGAGAAT                                   | protein binding,<br>structural molecule<br>activity                 | CLTC<br>clathrin, heavy chain (Hc)                                  | Homologue  |
|                         | Chc                         | CG9012  | taatacactactatagggCCGGA<br>ACGGGTGAAGAAC                                     | taatacactactatagggCACAA<br>TCCACGCTCGTAG                                     |                                                                     |                                                                     |            |
| 7                       | Clc                         | CG6948  | taatacactactatagggATCCT<br>CCACTGGCAGTTTGT                                   | taatacactactatagggTCAAT<br>GTGGTTAGGCGAGTG                                   | protein binding,<br>structural molecule<br>activity                 | CLTA<br>clathrin, light chain (Lca)                                 | Homologue  |
|                         | Clc                         | CG6948  | taatacactactatagggAGTCA<br>GCTCTCGGGGAC                                      | taatacactactatagggTTTCCC<br>GCCTTGTTCACC                                     |                                                                     |                                                                     |            |
| 8                       | $\alpha$ -adaptin           | CG4260  | taatacactactatagggCCATG<br>GCTATCGGTGAAACT                                   | taatacactactatagggGGCCG<br>TCTCCAGATAGTTGA                                   | protein binding,<br>protein transporter<br>activity                 | AP2A2<br>adaptor-related protein complex 2, alpha 2 subunit         | Homologue  |
|                         | $\alpha$ -adaptin           | CG4260  | taatacactactatagggGTGGA<br>CGTTATCCTCAATCTA                                  | taatacactactatagggAAAAT<br>TGAGCTCTCGCGTT                                    |                                                                     |                                                                     |            |
| 9                       | $\alpha$ -adaptin / CG31654 | CG31654 | taatacactactatagggCCTTTT<br>CATCTCAGTGTGGTG                                  | taatacactactatagggTGTTA<br>CGATCCGGGATAAGC                                   | protein binding,<br>protein transporter<br>activity                 | AP2A2<br>adaptor-related protein complex 2, alpha 2 subunit         | Homologue  |
| 10                      | $\alpha$ -adaptin           | CG31654 | taatacactactatagggGCCCT<br>GCGCAACATCAA                                      | taatacactactatagggGAATC<br>CTTCAAGGAAGCTGT                                   | protein binding,<br>protein transporter<br>activity                 | AP1B1<br>adaptor-related protein complex 1, beta 1 subunit          | Homologue  |
|                         | Bap                         | CG12532 | taatacactactatagggCCAGA<br>CATTCTCAAGCACGA                                   | TaatacactactatagggTTCAA<br>GGAAGCTGTCAAGCA                                   |                                                                     |                                                                     |            |
| 11                      | AP47                        | CG9388  | taatacactactatagggGCTAC<br>GCCATCAAGTGCTATC                                  | taatacactactatagggACCGG<br>GAAGAAGTCTGGAG                                    | protein binding                                                     | AP1M1<br>adaptor-related protein complex 1, mu 1 subunit            | Homologue  |
| 12                      | orange                      | CG3029  | taatacactactatagggGATTG<br>GCGGATCGGATTAC                                    | taatacactactatagggGCGTG<br>GAATATCAGGTCCAG                                   | protein binding,<br>protein transporter<br>activity                 | APS2<br>AP-3 complex subunit sigma-1                                | Best Blast |

|    |                    |                    |                                                       |                                                       |                                                                                            |                           |                                                                                         |                   |
|----|--------------------|--------------------|-------------------------------------------------------|-------------------------------------------------------|--------------------------------------------------------------------------------------------|---------------------------|-----------------------------------------------------------------------------------------|-------------------|
| 13 | <i>Eps15</i>       | <i>CG1693</i><br>2 | taatacgaactactatagggTCCGA<br>TCAATGGTCACACAG          | TaatacgaactactatagggGGAGT<br>AATGGCGTTGCTCTT          | <i>calcium ion binding</i>                                                                 | <i>EPS15</i><br><i>L1</i> | <i>epidermal growth factor receptor pathway substrate 15-like 1</i>                     | <i>Homologone</i> |
| 14 | <i>lqf</i>         | <i>CG8532</i>      | taatacgaactactatagggCCTAC<br>AATGTGGTGGCCTTT          | taatacgaactactatagggCAGTT<br>GAAGTTCCTCCTCGC          |                                                                                            | <i>EPN1</i>               | <i>epsin 1</i>                                                                          | <i>Homologone</i> |
|    | <i>lqf</i>         | <i>CG8532</i>      | TGCCATCATGAGCGAGA<br>TAGtaatacgaactactataggg          | taatacgaactactatagggGCTGC<br>AGTTGAAGTTCCTCC          |                                                                                            |                           |                                                                                         |                   |
| 15 | <i>corn</i>        | <i>CG3238</i><br>6 | taatacgaactactatagggGCTGA<br>GCGAATCTGTTGTCA          | taatacgaactactatagggAGTGT<br>GTCCGTTTTTGAGG           | <i>microtubule binding, protein binding</i>                                                | ?                         | ?                                                                                       |                   |
| 16 | <i>shibire</i>     | <i>CG1810</i><br>2 | taatacgaactactatagggATCGA<br>AGATGAAACGGATCG          | taatacgaactactatagggATGCC<br>TGGTGATATCCTTG           | <i>GTP binding, GTPase activity, actin binding, metarhodopsin binding, protein binding</i> | <i>DNM1</i>               | <i>dynamain 1</i>                                                                       | <i>Best Blast</i> |
| 17 | <i>Arr2</i>        | <i>CG5962</i>      | taatacgaactactatagggCCTGG<br>ATGGTCACTTGAAGG          | taatacgaactactatagggCGGTT<br>GGAGTAGCTTGAAGG          |                                                                                            | <i>ARRB</i><br>2          | <i>arrestin, beta 2 isoform 2</i>                                                       | <i>Best Blast</i> |
| 18 | <i>kurtz</i>       | <i>CG1487</i>      | taatacgaactactatagggGTGAG<br>CATGAGTGACGGAGA          | taatacgaactactatagggAACTT<br>TTACAGGTGTGGCCG          |                                                                                            | <i>ARRB</i><br>1          | <i>arrestin, beta 1</i>                                                                 | <i>Best Blast</i> |
|    | <i>kurtz</i>       | <i>CG1487</i>      | taatacgaactactatagggAAGTA<br>TTTCGGCCACACCTG          | taatacgaactactatagggTAGGG<br>TCGGACTCGCTTCTA          |                                                                                            |                           |                                                                                         |                   |
| 19 | <i>cenB1A</i>      | <i>CG6742</i>      | taatacgaactactatagggTGCGT<br>GACCTATTACCACCA          | taatacgaactactatagggTTGTC<br>GCTGAGGTAGAACCA          | <i>ARF GTPase activator activity, protein binding, zinc ion binding</i>                    | <i>CENT</i><br>B2         | <i>centaurin, beta 2</i>                                                                | <i>Homologone</i> |
| 20 | <i>Dor</i>         | <i>CG3093</i>      | taatacgaactactatagggTCTCT<br>GGCTCCGGCTATAAA          | taatacgaactactatagggTCTGC<br>CTTAAGCGTCTCCTG          |                                                                                            | <i>VPS18</i>              | <i>vacuolar protein sorting 18 homolog (S. cerevisiae)</i>                              | <i>Homologone</i> |
|    | <i>Dor</i>         | <i>CG3093</i>      | taatacgaactactatagggGTGTT<br>TAACCTCAGGGTGAC          | taatacgaactactatagggGCGTG<br>CTCGGCTATCA              |                                                                                            |                           |                                                                                         |                   |
| 21 | <i>CG3393</i><br>6 | <i>CG3393</i><br>6 | taatacgaactactatagggGGGCA<br>AGGGCAAGTACATAG          | taatacgaactactatagggTTGAT<br>CAGCTGACTCTGCGT          |                                                                                            | <i>ZFAN</i><br>D6         | <i>zinc finger, AN1-type domain 6</i>                                                   | <i>Homologone</i> |
| 22 | <i>CG6637</i>      | <i>CG6637</i>      | taatacgaactactatagggGGGCA<br>AGGGCAAGTACATAG          | taatacgaactactatagggTTGAT<br>CAGCTGACTCTGCGT          |                                                                                            | <i>SNF8</i>               | <i>SNF8, ESCRT-II complex subunit homologue (S. cerevisiae)</i>                         | <i>Homologone</i> |
| 23 | <i>CG9779</i>      | <i>CG9779</i>      | taatacgaactactatagggGCAGG<br>AGTGGACGCATAAGA          | taatacgaactactatagggTCTGA<br>ATGGAGTTGAGGTGC          |                                                                                            | <i>VPS24</i>              | <i>vacuolar protein sorting 24 homolog (S. cerevisiae)</i>                              | <i>Homologone</i> |
|    | <i>CG9779</i>      | <i>CG9779</i>      | taatacgaactactatagggGGCAA<br>CCAGCTGGATCG             | taatacgaactactatagggCGCAG<br>CAGACGCAGAC              |                                                                                            |                           |                                                                                         |                   |
| 24 | <i>Uba1</i>        | <i>CG1782</i>      | taatacgaactactatagggCCTTCT<br>GTACCAGCTCTGCG          | taatacgaactactatagggCTCTG<br>ATCGACGACAAACCC          | <i>binding, ubiquitin activating enzyme activity, ubiquitin-protein ligase activity</i>    | <i>UBE1</i>               | <i>ubiquitin-activating enzyme E1</i>                                                   | <i>Homologone</i> |
|    | <i>Uba1</i>        | <i>CG1782</i>      | taatacgaactactatagggTAAGG<br>CCTGCAGTGGAAAGTTT<br>ACA | taatacgaactactatagggGATCC<br>ATATATATGCGAGCATC<br>CAC |                                                                                            |                           |                                                                                         |                   |
| 25 | <i>Uba2</i>        | <i>CG9086</i>      | taatacgaactactatagggCTTGA<br>AGAAGGTGAGGCTGG          | taatacgaactactatagggGAAGA<br>CGTTCTCCGAGTTGG          | <i>protein binding, ubiquitin-protein ligase activity, zinc ion binding</i>                | <i>UBR2</i>               | <i>ubiquitin protein ligase E3 component n-recogin 2</i>                                | <i>Homologone</i> |
|    | <i>Uba2</i>        | <i>CG9086</i>      | taatacgaactactatagggATAGG<br>TTCAACACGATCCCC          | taatacgaactactatagggGAAGG<br>CTGGTGTAGTTTGG           |                                                                                            |                           |                                                                                         |                   |
| 26 | <i>Uba2</i>        | <i>CG7528</i>      | taatacgaactactatagggCAGAC<br>AATGCAGTGAATCGG          | taatacgaactactatagggACTGA<br>TTATGGCGTCAACTCTT        | <i>SUMO activating enzyme activity, protein binding</i>                                    | <i>SAE2</i>               | <i>SUMO1 activating enzyme subunit 2</i>                                                | <i>Homologone</i> |
|    | <i>Uba2</i>        | <i>CG7528</i>      | taatacgaactactatagggAACAT<br>TATTCTGCTATTGCCAC<br>CA  | taatacgaactactatagggGCTAC<br>GACTTCGAACAAGTTTTC<br>AT |                                                                                            |                           |                                                                                         |                   |
| 27 | <i>CG1435</i><br>4 | <i>CG1435</i><br>4 | taatacgaactactatagggAATGT<br>CAATGTGCGTGTGG           | taatacgaactactatagggCGTAG<br>GATCTTCGGTCCCTT          | <i>SUMO activating enzyme activity,</i>                                                    | <i>GRIPA</i><br>P1        | <i>GRIP1 associated protein 1 coatomer protein complex, subunit beta 2 (beta prime)</i> | <i>Best Blast</i> |
| 28 | <i>b'Cop</i>       | <i>CG6699</i>      | taatacgaactactatagggAGACC<br>ATTGCTCACAAATCCC         | taatacgaactactatagggAGCAG<br>ACCAGACTGCCACTT          | <i>protein binding, structural molecule activity,</i>                                      | <i>COPB</i><br>2          |                                                                                         | <i>Homologone</i> |
|    | <i>b'Cop</i>       | <i>CG6699</i>      | taatacgaactactatagggTTTCG<br>GAGTGCCTCAAAC            | taatacgaactactatagggCTCTTT<br>AACCAGAGACATGTTG        |                                                                                            |                           |                                                                                         |                   |
| 29 | <i>Amph</i>        | <i>CG8604</i>      | taatacgaactactatagggTAAGG<br>AAGGTGGCAAACAGC          | taatacgaactactatagggGTCGT<br>CATCTCAAACGGAT           | <i>protein binding,</i>                                                                    | <i>BIN1</i>               | <i>bridging integrator 1</i>                                                            | <i>Homologone</i> |
| 30 | <i>AnnX</i>        | <i>CG9579</i>      | taatacgaactactatagggCGTGG                             | taatacgaactactatagggAGTTG                             | <i>actin binding,</i>                                                                      | <i>ANXA</i>               | <i>annexin A6</i>                                                                       | <i>Homologone</i> |

|    |                   |                |                                                                  |                                                                |                                                                        |                |                                                           |                   |
|----|-------------------|----------------|------------------------------------------------------------------|----------------------------------------------------------------|------------------------------------------------------------------------|----------------|-----------------------------------------------------------|-------------------|
|    |                   |                | CCAATACTTACGTCC                                                  | AGTGCGTCCAGTCAC                                                | calcium ion binding, phospholipid binding                              | 6              |                                                           | ne                |
| 31 | <i>Arr1</i>       | <i>CG5711</i>  | taatacgaactactatagggGAGCTCGAACTGGAGGTCAC                         | taatacgaactactatagggAGAGCTGTGTCTTTGCGCCTT                      | metarhodopsin binding,                                                 | <i>ARRB2</i>   | <i>arrestin, beta 2 isoform 2</i>                         | <i>Best Blast</i> |
| 32 | <i>CG2774</i>     | <i>CG2774</i>  | taatacgaactactatagggCATCCATGATCTGCTTGTTGG                        | taatacgaactactatagggACCTCGGTGATCTTGTGCTC                       | phosphoinositide binding, protein binding                              | <i>SNX2</i>    | <i>sorting nexin 2</i>                                    | <i>Homologone</i> |
|    |                   | <i>CG2774</i>  | taatacgaactactatagggTCCAA                                        | taatacgaactactatagggGTAGCTCTATCTTCTCCTCC                       |                                                                        |                |                                                           |                   |
| 33 | <i>opa1-like</i>  | <i>CG8479</i>  | taatacgaactactatagggGTCAGGTACTGCCAGTGGGT                         | taatacgaactactatagggTGCCAGGAATTCATATCG                         | GTP binding, GTPase activity                                           | <i>OPAI</i>    | <i>optic atrophy 1 (autosomal dominant)</i>               | <i>Homologone</i> |
|    |                   | <i>CG8479</i>  | taatacgaactactatagggGAGAA                                        | taatacgaactactatagggTTATTC                                     |                                                                        |                |                                                           |                   |
| 34 | <i>CG9139</i>     | <i>CG9139</i>  | GATGGAGAAGGAGAAAC<br>taatacgaactactatagggTACCC<br>AACAGCGTGGTCAT | CTGGCAAATCGACTA<br>taatacgaactactatagggTTGTG<br>GTTCTGCGTCATCA | DNA binding, guanyl-nucleotide                                         | <i>RABGEF1</i> | <i>RAB guanine nucleotide exchange factor (GEF) 1</i>     | <i>Homologone</i> |
| 35 | <i>CG9318</i>     | <i>CG9318</i>  | taatacgaactactatagggGCAAA<br>CGATCGAGGTAAGGA                     | taatacgaactactatagggGCATG<br>GTGGCAATGATAATG                   |                                                                        | <i>TM9SF2</i>  | <i>transmembrane 9 superfamily member 2</i>               | <i>Best Blast</i> |
| 36 | <i>CG10971</i>    | <i>CG10971</i> | taatacgaactactatagggATTTT<br>GCAGTCTTCGGTTG                      | taatacgaactactatagggGGTCA<br>GCGTAACGAGGATTT                   |                                                                        | <i>HIP1</i>    | <i>huntingtin interacting protein 1</i>                   | <i>Homologone</i> |
| 37 | <i>CG2774</i>     | <i>CG2774</i>  | taatacgaactactatagggGGAAC<br>TTTGAGGCGGAAGAC                     | taatacgaactactatagggCATTT<br>AGATCAGCGGCACCT                   | phosphoinositide binding, protein binding                              | <i>SNX2</i>    | <i>sorting nexin 2</i>                                    | <i>Homologone</i> |
|    |                   | <i>CG31048</i> | taatacgaactactatagggGCAAG<br>TACCAGGAGGCTTTCTCTC<br>T            | taatacgaactactatagggTTCTG<br>CGAGCGAGGACGATTGT<br>GTA          |                                                                        |                |                                                           |                   |
| 38 | <i>CG31064</i>    | <i>CG31064</i> | taatacgaactactatagggATGCG<br>GCTCCAGAAGAC                        | taatacgaactactatagggTTTCG<br>GTACATCTCCAGGTT                   | zinc ion binding                                                       | <i>RUFY2</i>   | <i>RUN and FYVE domain containing 2</i>                   | <i>Homologone</i> |
|    |                   | <i>CG31064</i> | taatacgaactactatagggTTGAG<br>CGCAGTAATCTGGTG                     | taatacgaactactatagggCGCTC<br>ATCATCAGAGCATGT                   |                                                                        |                |                                                           |                   |
| 39 | <i>epsin-like</i> | <i>CG31170</i> | taatacgaactactatagggGCAGC<br>GGCACTATATGTTGA                     | taatacgaactactatagggCATTC<br>TTTTATCAGCCCGGA                   | molecular function                                                     | <i>CLINT1</i>  | <i>clathrin interactor 1</i>                              | <i>Homologone</i> |
| 40 | <i>Rab9Fb</i>     | <i>CG32670</i> | taatacgaactactatagggTATTG<br>CTGTCTTTGGCCCTC                     | taatacgaactactatagggGAGAT<br>ACGGCGCATGTCTTC                   | GTP binding, GTPase activity                                           | <i>RAB26</i>   | <i>RAB26, member RAS oncogene family</i>                  | <i>Best Blast</i> |
| 41 | <i>Rab9D</i>      | <i>CG32678</i> | taatacgaactactatagggGAGCC<br>AATACGACAATCCGT                     | taatacgaactactatagggACGAT<br>GGGCATAGTTGAACC                   | ATP binding, GTP binding, GTPase activity                              | <i>RAB26</i>   | <i>RAB26, member RAS oncogene family</i>                  | <i>Best Blast</i> |
| 42 | <i>aCop</i>       | <i>CG7961</i>  | taatacgaactactatagggGGACG<br>AGTCTGGAGTGTTT                      | taatacgaactactatagggAGGAA<br>GCTAAGCTTGTCAAA                   | protein binding, structural molecule activity                          | <i>COPA</i>    | <i>coatamer protein complex, subunit alpha</i>            | <i>Homologone</i> |
| 43 | <i>opa1-like</i>  | <i>CG8479</i>  | taatacgaactactatagggTCTTTT<br>TGCTTTTCGACACA                     | taatacgaactactatagggAGCAA<br>GATAGACCAAGCCACA                  |                                                                        | <i>OPAI</i>    | <i>optic atrophy 1 (autosomal dominant)</i>               | <i>Homologone</i> |
| 44 | <i>faf</i>        | <i>CG1945</i>  | taatacgaactactatagggGCCAA<br>CTAAAGGTTTCTGCG                     | taatacgaactactatagggCAGAG<br>ACCACGTGGAACGTA                   | ubiquitin thiolesterase activity, ubiquitin-specific protease activity | <i>USP9X</i>   | <i>ubiquitin specific peptidase 9, X-linked</i>           | <i>Homologone</i> |
|    |                   | <i>CG1945</i>  | taatacgaactactatagggAACTT<br>AAGTCAGCGATGGATG<br>GGT             | taatacgaactactatagggGATGC<br>GGATCAAGTTGCAGGAT<br>GTT          |                                                                        |                |                                                           |                   |
| 45 | <i>gig</i>        | <i>CG6975</i>  | taatacgaactactatagggCAACA<br>CGCTCCTCAAGATCA                     | taatacgaactactatagggCAGAA<br>ATTCCAGAACCGGAG                   | GTPase activator activity, kinase binding                              | <i>TSC2</i>    | <i>tuberous sclerosis 2</i>                               | <i>Homologone</i> |
|    |                   | <i>CG6975</i>  | taatacgaactactatagggTACAG<br>CACCAAGGATATGCGTG<br>TGA            | taatacgaactactatagggGTTCA<br>TGCACAGCTTGGTGTG<br>ATG           |                                                                        |                |                                                           |                   |
| 46 | <i>hk</i>         | <i>CG10653</i> | taatacgaactactatagggAATTG<br>TCCGCATTTACAGCTC                    | taatacgaactactatagggTTAAG<br>ATATGCGAGGCCAG                    | microtubule binding                                                    | <i>HOOK3</i>   | <i>golgi-associated microtubule-binding protein HOOK3</i> | <i>Best Blast</i> |
| 47 | <i>Mer</i>        | <i>CG14228</i> | taatacgaactactatagggACACC<br>AGGTGCAACAGATCC                     | taatacgaactactatagggCACTA<br>GATGGCACAGGAGCA                   | cytoskeletal protein binding, protein binding                          | <i>NF2</i>     | <i>neurofibromin 2 (bilateral acoustic neuroma)</i>       | <i>Homologone</i> |
| 48 | <i>Drp1</i>       | <i>CG3210</i>  | taatacgaactactatagggAGCTT<br>GAGTGCCCTACTGGT                     | taatacgaactactatagggTTCCCT<br>GCACACCAAGAAAGTG                 | GTP binding, GTPase activity                                           | <i>DNM1L</i>   | <i>dynamain 1-like</i>                                    | <i>Homologone</i> |
| 49 | <i>Past1</i>      | <i>CG6148</i>  | taatacgaactactatagggACGTT                                        | taatacgaactactatagggGTCTG                                      | GTP binding,                                                           | <i>SRL</i>     | <i>sarcalumenin</i>                                       | <i>Best Blast</i> |

|    |                 |                 |                                                       |                                                       |                                                             |                 |                                                              |                   |
|----|-----------------|-----------------|-------------------------------------------------------|-------------------------------------------------------|-------------------------------------------------------------|-----------------|--------------------------------------------------------------|-------------------|
|    |                 |                 | GATTGGTCCGCTATC                                       | GATCCTCGAGCTTTG                                       | <i>GTPase activity, calcium ion binding</i>                 |                 |                                                              |                   |
| 50 | <i>Pi3K59 F</i> | <i>CG5373</i>   | taatacgaactactatagggGGCAC<br>CTCCATCTCAATGTT          | taatacgaactactatagggACATG<br>TCATCCACCACGATG          | <i>1-phosphatidylinositol-3-kinase activity,</i>            | <i>PIK3C 3</i>  | <i>phosphoinositide-3-kinase, class 3</i>                    | <i>Homologous</i> |
| 51 | <i>Pi3K68 D</i> | <i>CG1162 1</i> | taatacgaactactatagggCTCTC<br>CTGATCCCTCGTCTG          | taatacgaactactatagggAAGCC<br>CTCCACAGACTTTCA          | <i>1-phosphatidylinositol-3-kinase activity,</i>            | <i>PIK3C 2A</i> | <i>phosphoinositide-3-kinase, class 2, alpha polypeptide</i> | <i>Homologous</i> |
| 52 | <i>Rab-RP3</i>  | <i>CG7062</i>   | taatacgaactactatagggCTTAT<br>CAGCGGGGTGTTTGT          | taatacgaactactatagggTTTAA<br>GTTCTGTGGCCAGG           | <i>GTP binding, GTPase activity</i>                         | <i>RAB43</i>    | <i>RAB43, member RAS oncogene family</i>                     | <i>Homologous</i> |
| 53 | <i>RabX2</i>    | <i>CG2885</i>   | taatacgaactactatagggTAAGG<br>TTCTGTCCTGGGTG           | taatacgaactactatagggTCCTC<br>CTCTTCTGCTCAGA           | <i>ATP binding, GTP binding, GTPase activity</i>            | <i>RAB12</i>    | <i>RAB12, member RAS oncogene family</i>                     | <i>Best Blast</i> |
|    | <i>RabX2</i>    | <i>CG2885</i>   | taatacgaactactatagggCTTCG<br>ACTATCTGTTTAAGGTTCTC     | taatacgaactactatagggGTTGT<br>GAAGTACATAACGATGGTAT     |                                                             |                 |                                                              |                   |
| 54 | <i>RabX4</i>    | <i>CG3111 8</i> | taatacgaactactatagggGACAG<br>GAAGGCATCTTCGAT          | taatacgaactactatagggAAGCT<br>GCAAATCTGGGACAC          | <i>GTP binding, GTPase activity</i>                         | <i>RAB26</i>    | <i>RAB26, member RAS oncogene family</i>                     | <i>Best Blast</i> |
|    | <i>RabX4</i>    | <i>CG3111 8</i> | taatacgaactactatagggccagAT<br>TGCCGAAAACCTTC          | taatacgaactactatagggAGCCC<br>AGTCCCTTAACTGGT          |                                                             |                 |                                                              |                   |
| 55 | <i>Rab1</i>     | <i>CG3320</i>   | taatacgaactactatagggTTCCG<br>GATTCACAGATGACA          | taatacgaactactatagggATTTTC<br>CAACACTGCCGCTA          | <i>GTP binding, GTPase activity,</i>                        | <i>RAB1 A</i>   | <i>RAB1A, member RAS oncogene family</i>                     | <i>Homologous</i> |
|    | <i>Rab1</i>     | <i>CG3320</i>   | taatacgaactactatagggGTTAT<br>ATCAGCACAATCGGAGT<br>GGA | taatacgaactactatagggTCAGC<br>AGCAACCGGATTTGGTG<br>TTT |                                                             |                 |                                                              |                   |
| 56 | <i>Rab3</i>     | <i>CG7576</i>   | taatacgaactactatagggTGACG<br>TTGACGTTCTCCTTG          | taatacgaactactatagggGGACA<br>GGAGCGGTACAGAAC          | <i>GTP binding, GTPase activity</i>                         | <i>RAB12</i>    | <i>RAB12, member RAS oncogene family</i>                     | <i>Best Blast</i> |
| 57 | <i>Rab4</i>     | <i>CG4921</i>   | taatacgaactactatagggACACC<br>ATCGGAGTGGAGTTC          | taatacgaactactatagggAAGGT<br>GCTTGCTTCCAGAAA          | <i>GTP binding, GTPase activity</i>                         | <i>RAB4 B</i>   | <i>RAB4B, member RAS oncogene family</i>                     | <i>Homologous</i> |
| 58 | <i>Rab8</i>     | <i>CG8287</i>   | taatacgaactactatagggCTTCG<br>ATTTTCGCTATCGCT          | taatacgaactactatagggCATGG<br>TGGCAACGACTACAC          | <i>ATP binding, GTP binding, GTPase activity</i>            | <i>RAB8 A</i>   | <i>RAB8A, member RAS oncogene family</i>                     | <i>Homologous</i> |
| 59 | <i>Rab10</i>    | <i>CG1706 0</i> | taatacgaactactatagggTGAAC<br>ATGGCATTGCGTTTA          | taatacgaactactatagggATCCA<br>TCGTTGCGAGTTTTG          | <i>ATP binding, GTP binding, GTPase activity</i>            | <i>RAB10</i>    | <i>RAB10, member RAS oncogene family</i>                     | <i>Homologous</i> |
| 60 | <i>Rab26</i>    | <i>CG7605</i>   | taatacgaactactatagggACTGC<br>TGCTGTACGACGTGA          | taatacgaactactatagggTGAAG<br>GACAGCTCCACATTG          | <i>ATP binding, GTP binding, GTPase activity,</i>           | <i>RAB37</i>    | <i>RAB37, member RAS oncogene family</i>                     | <i>Homologous</i> |
| 61 | <i>Rab27</i>    | <i>CG1479 1</i> | taatacgaactactatagggGGATG<br>ATTAGCCGCTTGAAC          | taatacgaactactatagggACAAC<br>CATTGCTTGGGAGAG          | <i>ATP binding, GTP binding, GTPase activity</i>            | <i>RAB27 A</i>  | <i>RAB27A, member RAS oncogene family</i>                    | <i>Homologous</i> |
| 62 | <i>Rab30</i>    | <i>CG9100</i>   | taatacgaactactatagggTACTG<br>CCATCCTTGCTCCTT          | taatacgaactactatagggACACC<br>CAGCGACTCAAAAAC          | <i>GTP binding, GTPase activity</i>                         | <i>RAB30</i>    | <i>RAB30, member RAS oncogene family</i>                     | <i>Homologous</i> |
|    | <i>Rab30</i>    | <i>CG9100</i>   | taatacgaactactatagggTCAGC<br>CGCCTTGACTAGAGTTG<br>GA  | taatacgaactactatagggTCAGC<br>CGCCTTGACTAGAGTTG<br>GA  |                                                             |                 |                                                              |                   |
| 63 | <i>Rab35</i>    | <i>CG9575</i>   | taatacgaactactatagggTGTTG<br>GTTGTTTGGTGGTGT          | taatacgaactactatagggGGAAG<br>GTGGTCATTACCGAA          | <i>ATP binding, GTP binding, GTPase activity,</i>           | <i>RAB35</i>    | <i>RAB35, member RAS oncogene family</i>                     | <i>Homologous</i> |
| 64 | <i>Rab40</i>    | <i>CG1900</i>   | taatacgaactactatagggGATCG<br>ATACCGTCGAAGCTC          | taatacgaactactatagggACATG<br>GGAACCATGACCAAG          | <i>GTP binding, GTPase activity, Protein ubiquitination</i> | <i>RAB40 C</i>  | <i>RAB40C, member RAS oncogene family</i>                    | <i>Homologous</i> |
| 65 | <i>Scamp</i>    | <i>CG9195</i>   | taatacgaactactatagggTGTGT<br>GGTGTGGTCCATTTCT         | taatacgaactactatagggGCCCT<br>TGCTCTCTTGGAGAT          | <i>phosphatidylethanolamine binding,</i>                    | <i>SCAMP1</i>   | <i>secretory carrier membrane protein 1</i>                  | <i>Homologous</i> |
| 66 | <i>Spri</i>     | <i>CG3317 5</i> | taatacgaactactatagggCAACA<br>ACAACGGCCAACC            | taatacgaactactatagggGTGGC<br>AACCGCTGGACT             | <i>Ras GTPase binding</i>                                   | <i>RIN2</i>     | <i>Ras and Rab interactor 2</i>                              | <i>Homologous</i> |
| 78 | <i>Ubp64E</i>   | <i>CG5486</i>   | taatacgaactactatagggAAGAG<br>GCTCAGCTGCGTAAG          | taatacgaactactatagggATACG<br>CAAGGCAGTTTGGAC          | <i>ubiquitin thiolesterase activity,</i>                    | <i>USP47</i>    | <i>ubiquitin specific peptidase 47</i>                       | <i>Homologous</i> |
